# Supplementary material for: Characterization of Local Mediterranean Grapevine Varieties for Their Resilience to Semi-Arid Conditions under a Rain-Fed Regime
Source: MDPI journal article supplement (doi:10.3390/agronomy12092234), 2022-09-19
Supplement: s1 [file s1]

**Table S2.** Molecular profile of the grapevine varieties Arcos, Bobal, Forcallat, Garnacha, Monastrell and Veremeta clara analysed by the following 15 SSRs markers.

| Variety/SSRs | ARCOS | BOBAL | FORCALLAT | GARNACHA TINTA | MONASTRELL | VEREMETA CLARA |
|--------------|-------|-------|-----------|----------------|------------|----------------|
| VVS2A1       | 133   | 145   | 133       | 137            | 133        | 133            |
| VVS2A2       | 145   | 147   | 145       | 145            | 151        | 151            |
| VVMD5A1      | 228   | 230   | 224       | 228            | 228        | 228            |
| VVMD5A2      | 236   | 236   | 236       | 242            | 242        | 242            |
| VVMD7A1      | 243   | 239   | 239       | 239            | 249        | 249            |
| VVMD7A2      | 249   | 243   | 243       | 243            | 249        | 249            |
| VVMD25A1     | 241   | 241   | 241       | 241            | 241        | 241            |
| VVMD25A2     | 241   | 267   | 255       | 255            | 263        | 263            |
| VVMD27A1     | 180   | 182   | 180       | 195            | 180        | 180            |
| VVMD27A2     | 195   | 190   | 182       | 195            | 190        | 190            |
| VVMD28A1     | 234   | 234   | 228       | 244            | 244        | 244            |
| VVMD28A2     | 258   | 260   | 258       | 244            | 258        | 258            |
| VVMD32A1     | 256   | 250   | 240       | 240            | 240        | 240            |
| VVMD32A2     | 262   | 272   | 256       | 250            | 256        | 256            |
| VrZAG62A1    | 188   | 188   | 188       | 188            | 188        | 188            |
| VrZAG62A2    | 204   | 188   | 188       | 188            | 204        | 204            |
| VrZAG79A1    | 257   | 243   | 247       | 257            | 251        | 251            |
| VrZAG79A2    | 261   | 247   | 261       | 257            | 261        | 261            |
| VrZAG64A1    | 140   | 140   | 134       | 134            | 157        | 157            |
| VrZAG64A2    | 157   | 157   | 140       | 140            | 157        | 157            |
| VrZAG83A1    | 191   | 197   | 193       | 191            | 193        | 193            |
| VrZAG83A2    | 193   | 197   | 203       | 193            | 203        | 203            |
| VVMD24A1     | 208   | 206   | 208       | 208            | 206        | 206            |

|                  |     |     |     |     |     |     |
|------------------|-----|-----|-----|-----|-----|-----|
| <b>VVMD24A2</b>  | 215 | 208 | 215 | 215 | 215 | 215 |
| <b>VMC1b11A1</b> | 188 | 185 | 185 | 188 | 173 | 173 |
| <b>VMC1b11A2</b> | 188 | 188 | 188 | 194 | 188 | 188 |
| <b>VVMD6A1</b>   | 208 | 191 | 208 | 208 | 208 | 208 |
| <b>VVMD6A2</b>   | 208 | 191 | 210 | 208 | 210 | 210 |
| <b>VVMD21A1</b>  | 242 | 242 | 242 | 242 | 242 | 242 |
| <b>VVMD21A2</b>  | 248 | 242 | 242 | 248 | 248 | 248 |

**Table S3.** Cielab color parameters for leaves of Arcos, Bobal, Forcallat, Garnacha and Veremeta

|                   | <b>Upperside</b> |           |           | <b>Underside</b> |           |           |
|-------------------|------------------|-----------|-----------|------------------|-----------|-----------|
| <b>September</b>  | <b>L*</b>        | <b>a*</b> | <b>b*</b> | <b>L*</b>        | <b>a*</b> | <b>a*</b> |
| <b>Arcos</b>      | 32,84 ab         | -9,21 cd  | 12,23 a   | 44,08 ab         | -7,91 bc  | 14,53 b   |
| <b>Bobal</b>      | 31,15 a          | -8,43 d   | 11,48 a   | 45,18 bc         | -7,13 c   | 13,55 a   |
| <b>Forcallat</b>  | 38,76 c          | -11,77 a  | 17,27 c   | 50,57 d          | -8,37 b   | 16,39 d   |
| <b>Garnacha</b>   | 33,18 ab         | -10,07 bc | 12,55 a   | 42,70 a          | -10,73 a  | 15,70 cd  |
| <b>Monastrell</b> | 33,28 b          | -10,54 b  | 14,07b    | 45,13 bc         | -7,79 bc  | 14,90 bc  |
| <b>Veremeta</b>   | 32,22 ab         | -8,66 d   | 12,07 a   | 46,68 c          | -7,94 bc  | 14,31 ab  |

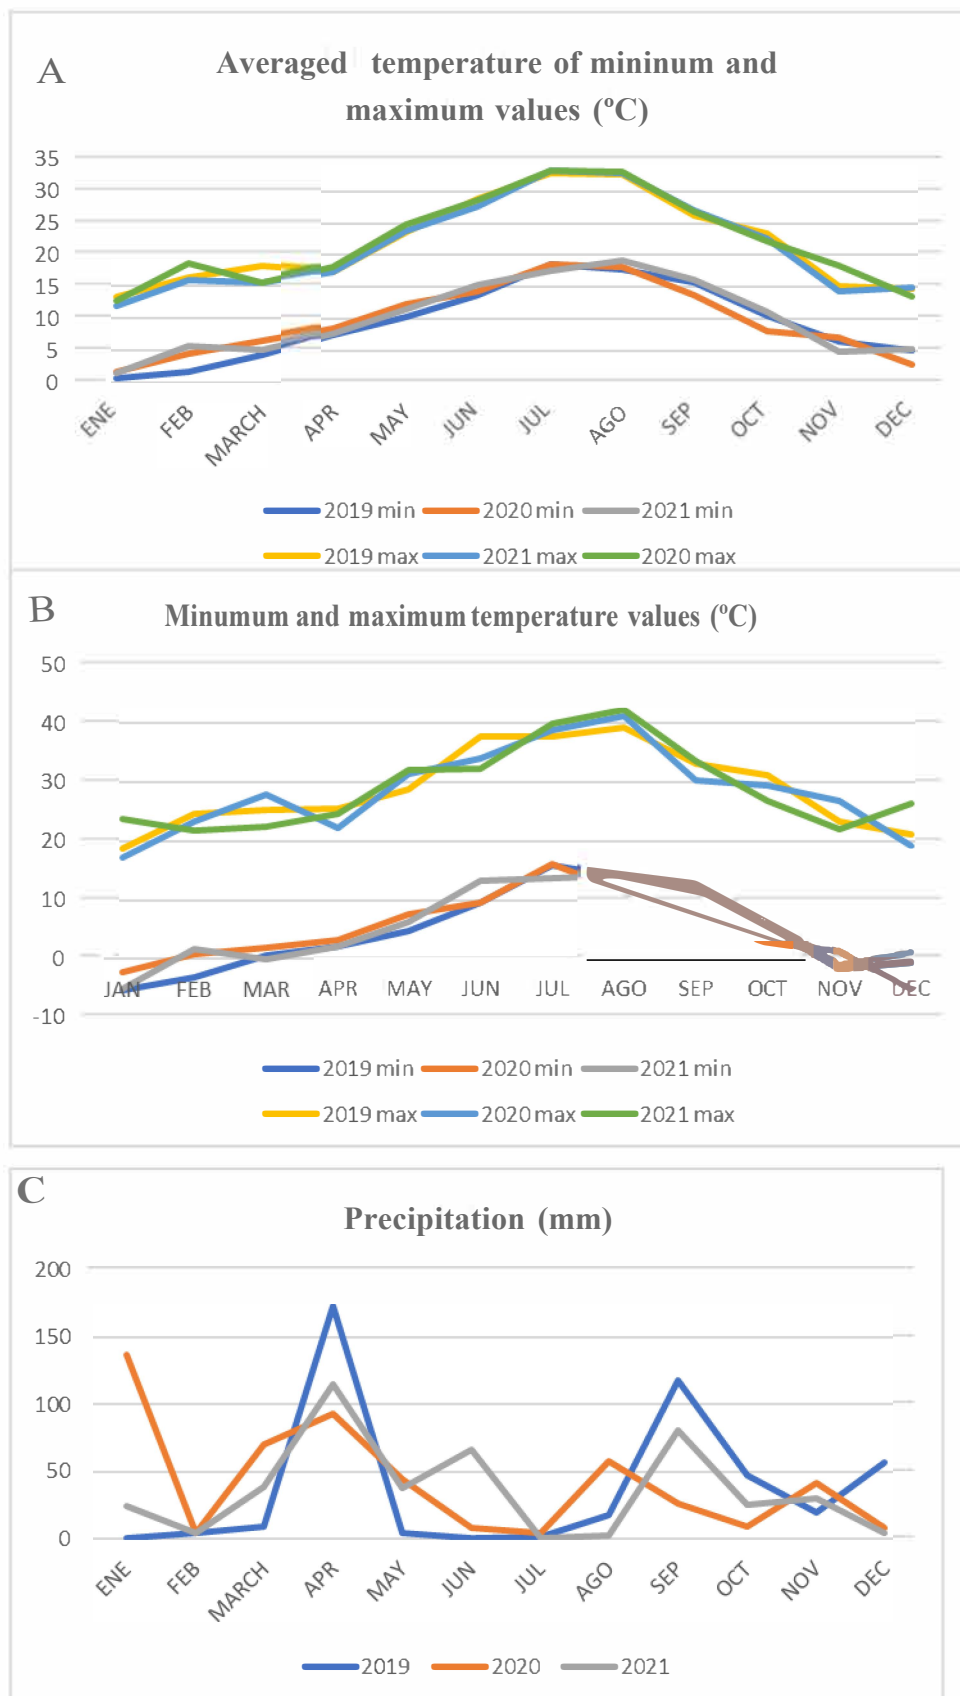

**Figure S1.** Metereological data in the area of study (AVAMET, Beneixama)

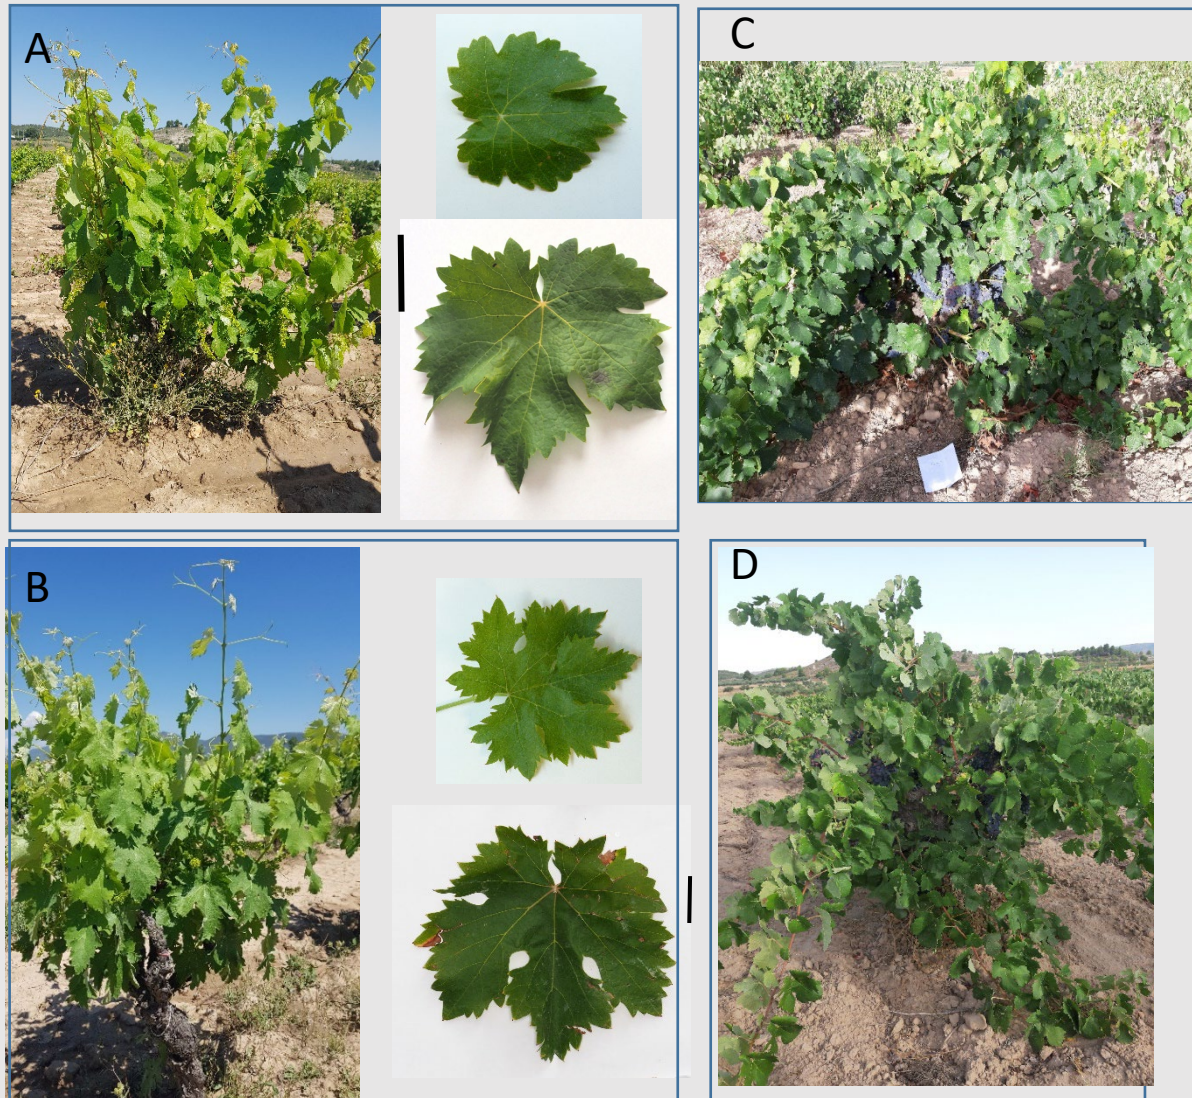

**Figure S2.** Growth of Arcos (A), Forcallat (B), Garnacha (C) and Bobal (D). In A and B details of leaves from Arcos and Forcallat.



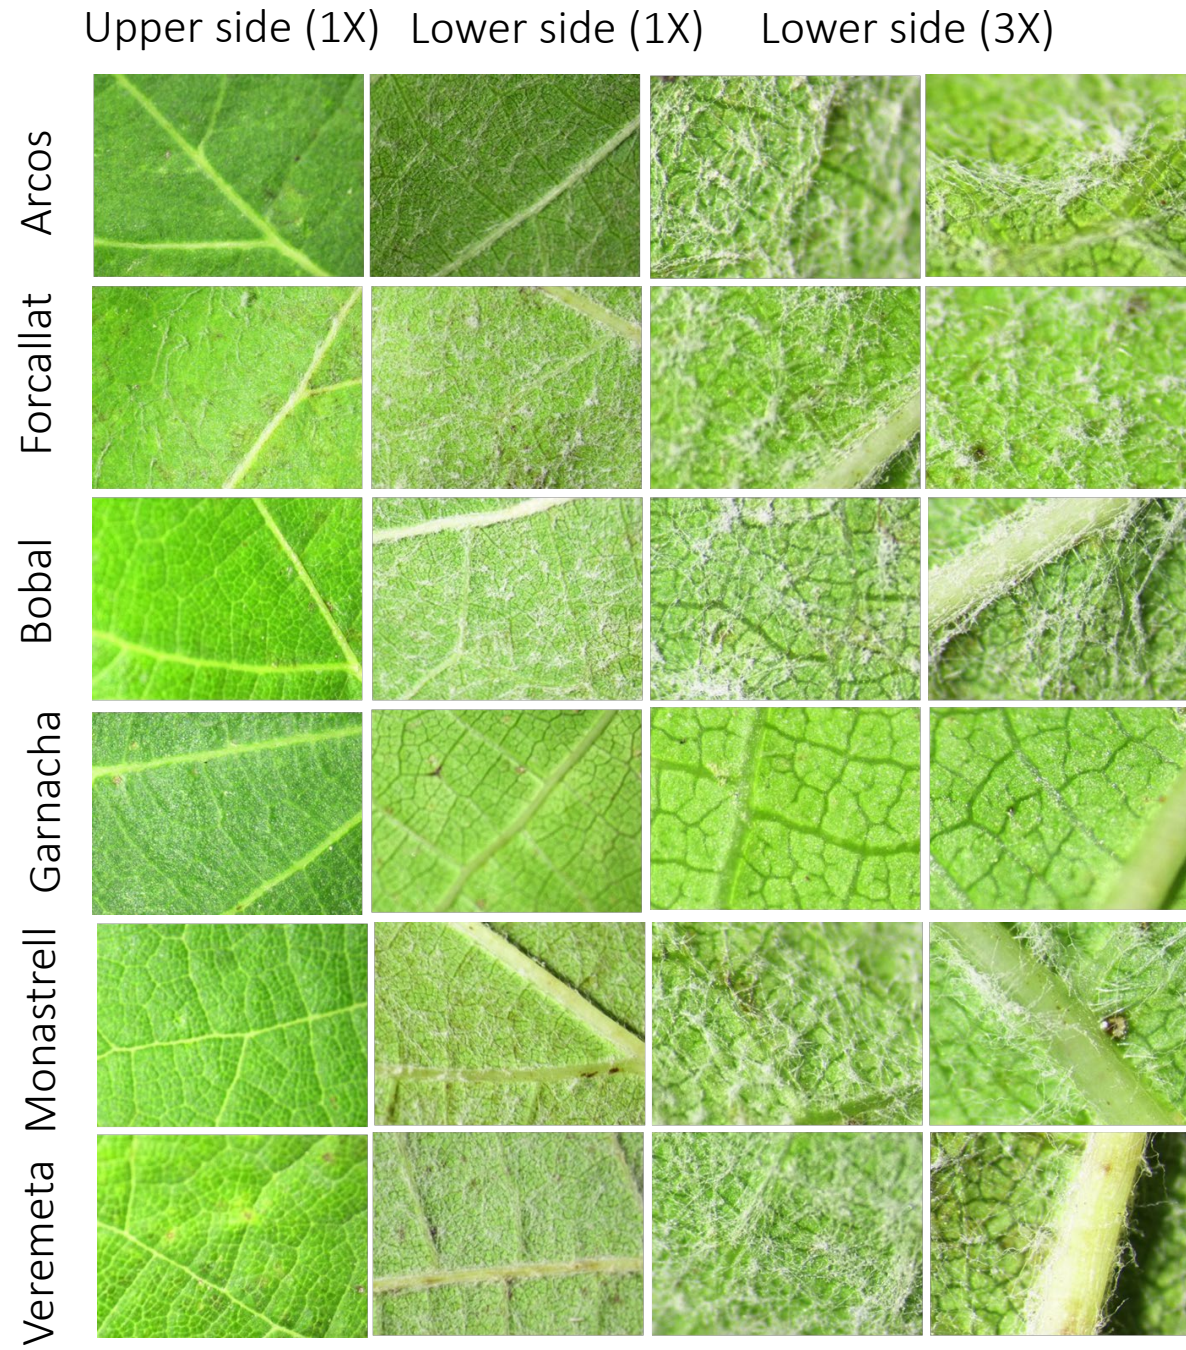

**Figure S3.** Upper side and Lower side of leaves from Arcos, Forcallat, Bobal, Garnacha, Monastrell and Vermeta.



**Figure S4.** Images of bunches from the grapevine varieties Arcos, Bobal, Forcallat, Garnacha, Monastrell and Veremeta on 10th August and 24th September 2021.

**Arcos**

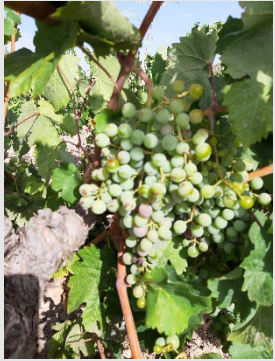

**Bobal**

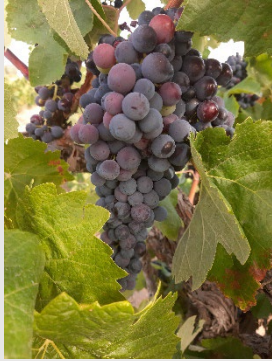

**Forcallat**

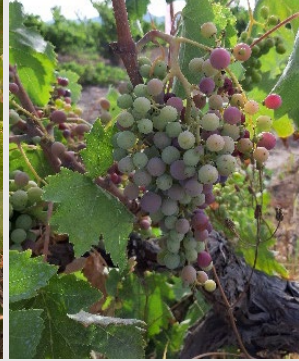

**Garnacha**

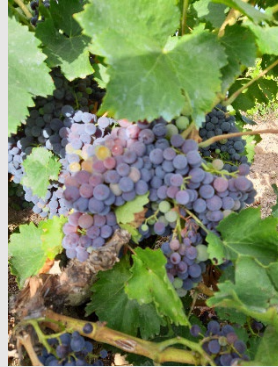

**Monastrell**

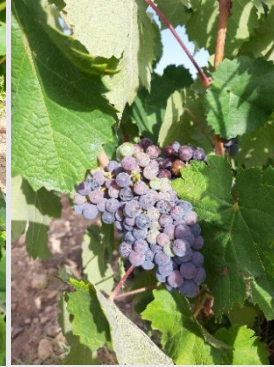

**Veremeta**

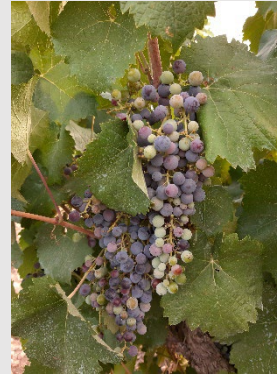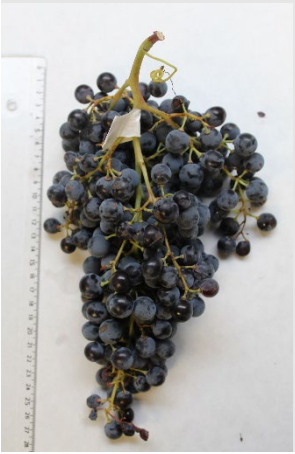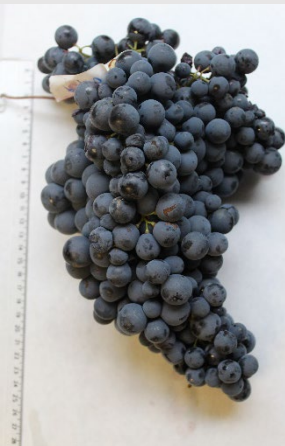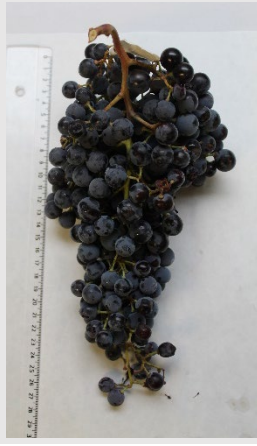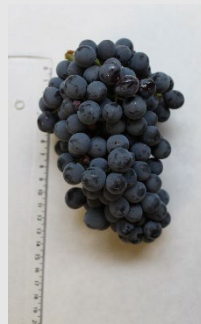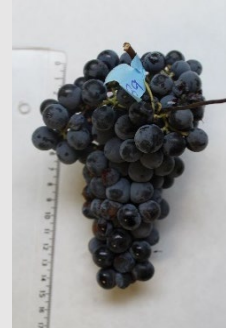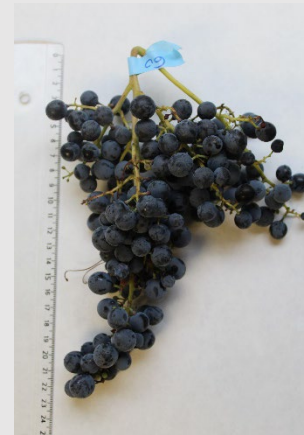



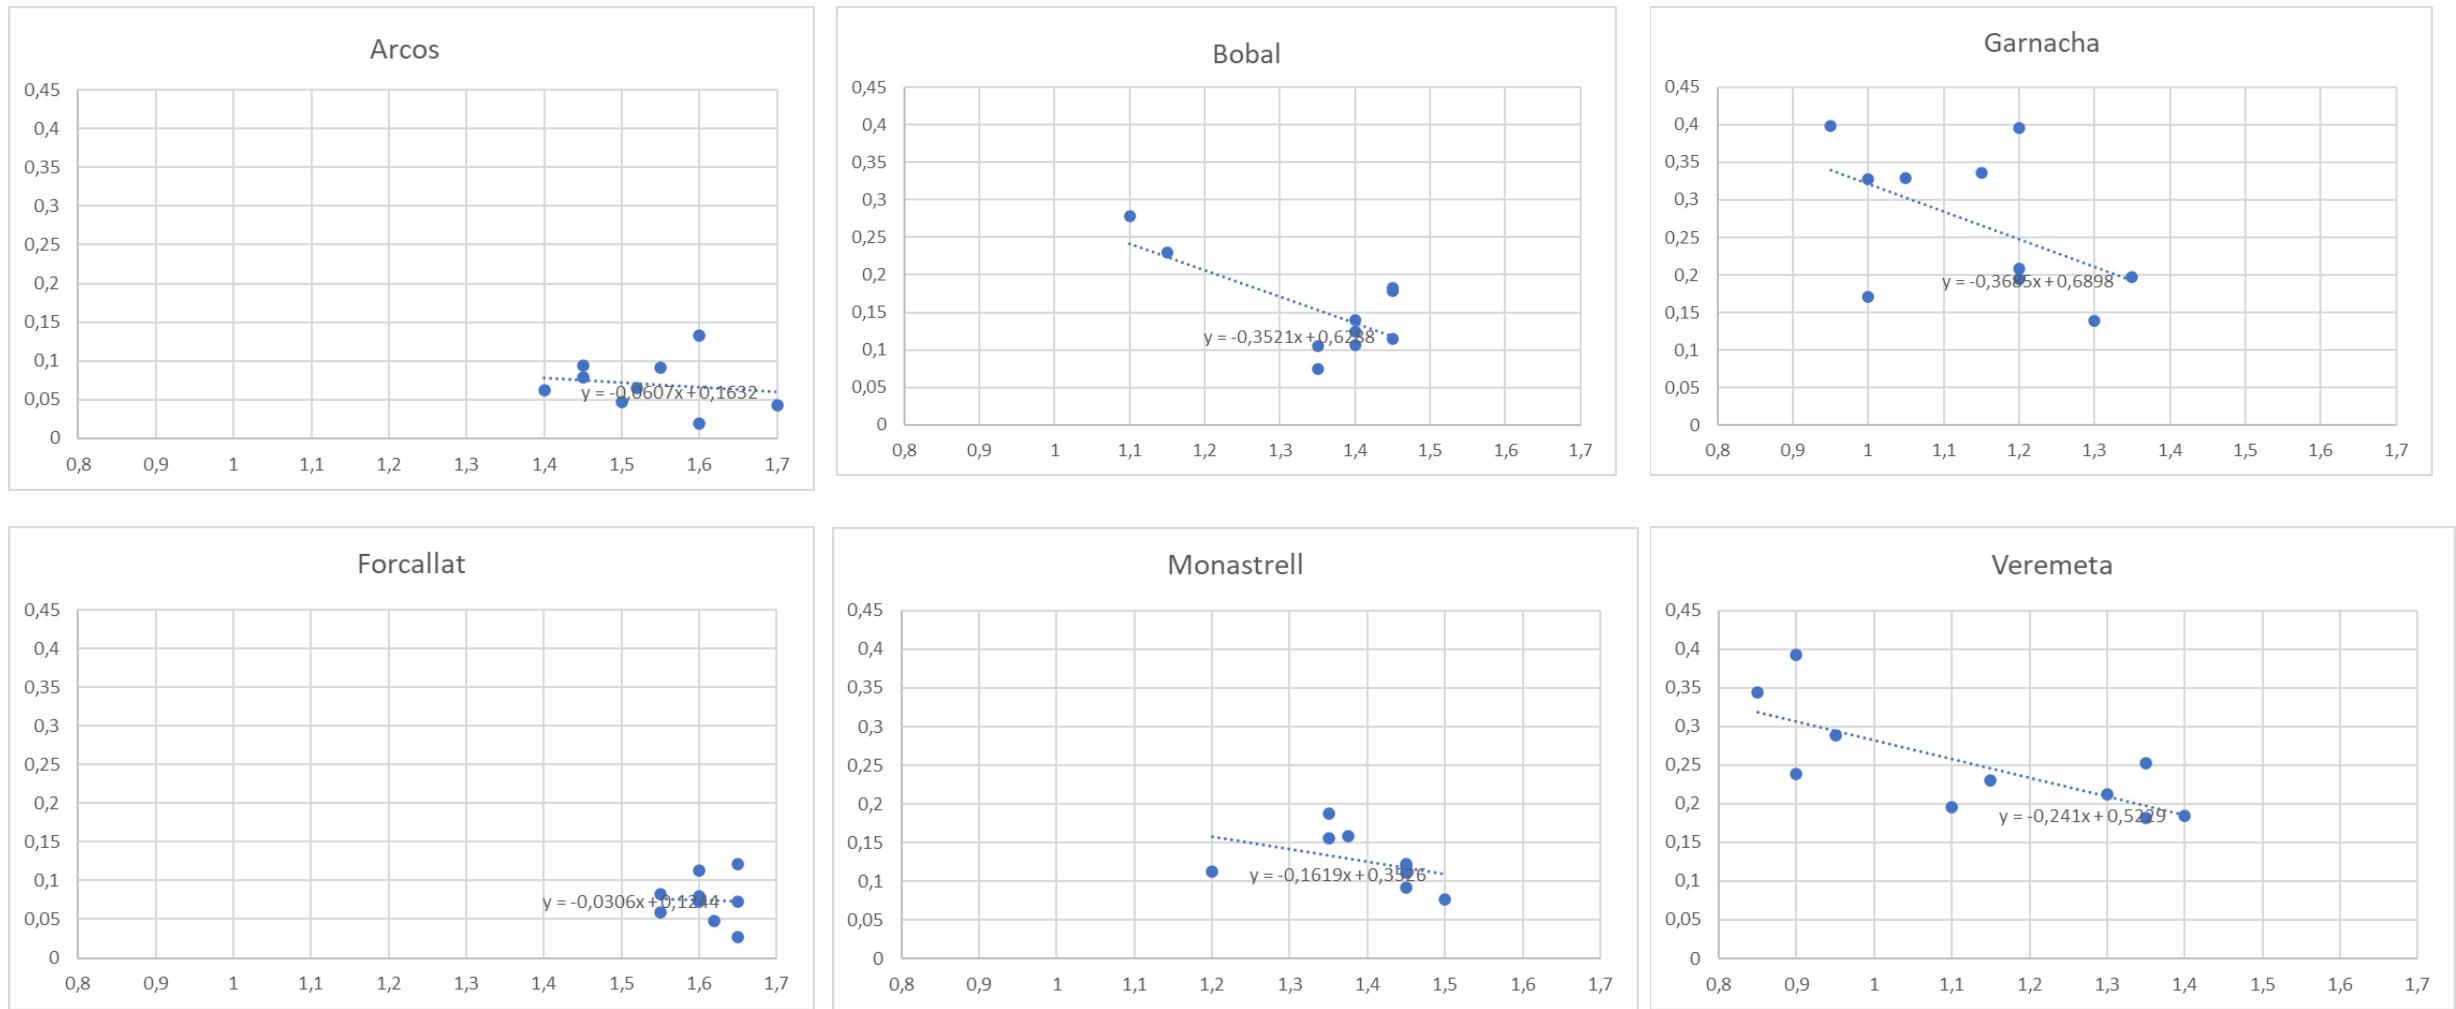

**Figure S5.** Correlation of stomatal conductance ( $g_s$ ) and stem wáter potential ( $\Psi_{\text{stem}}$ ) of grapevine varieties Arcos, Bobal, Garnacha, Forcallat, Monastrell and Veremeta on 20th August 2021.
